# Supplementary material for: Diminished Pathogen and Enhanced Endophyte Colonization upon CoInoculation of Endophytic and Pathogenic Fusarium Strains
Source: MDPI journal article supplement (doi:10.3390/microorganisms8040544), 2020-04-09
Supplement: s1 [file s1]

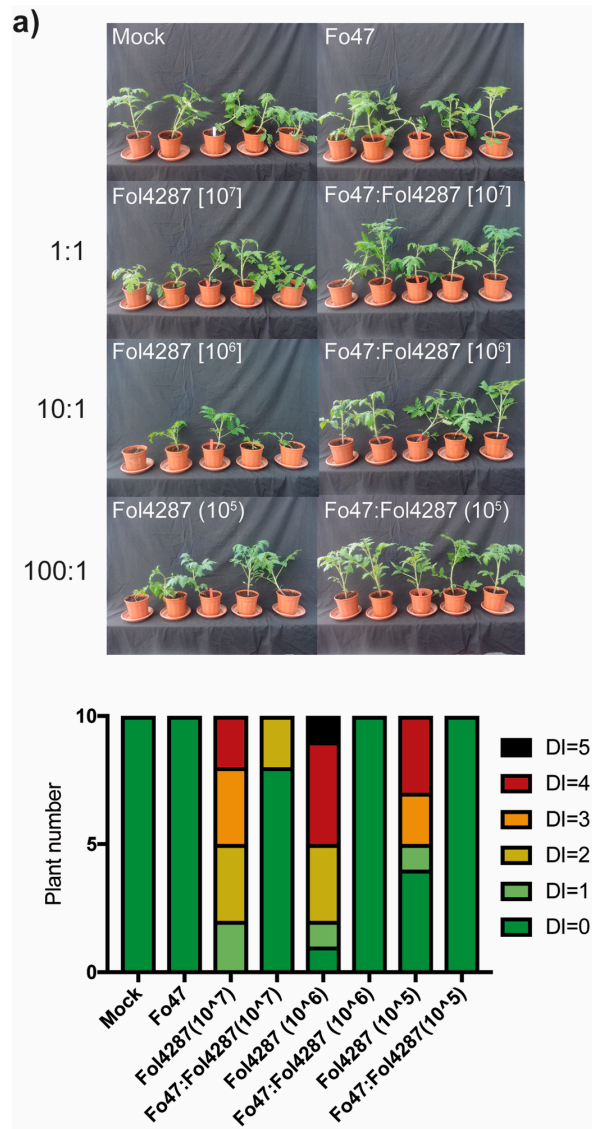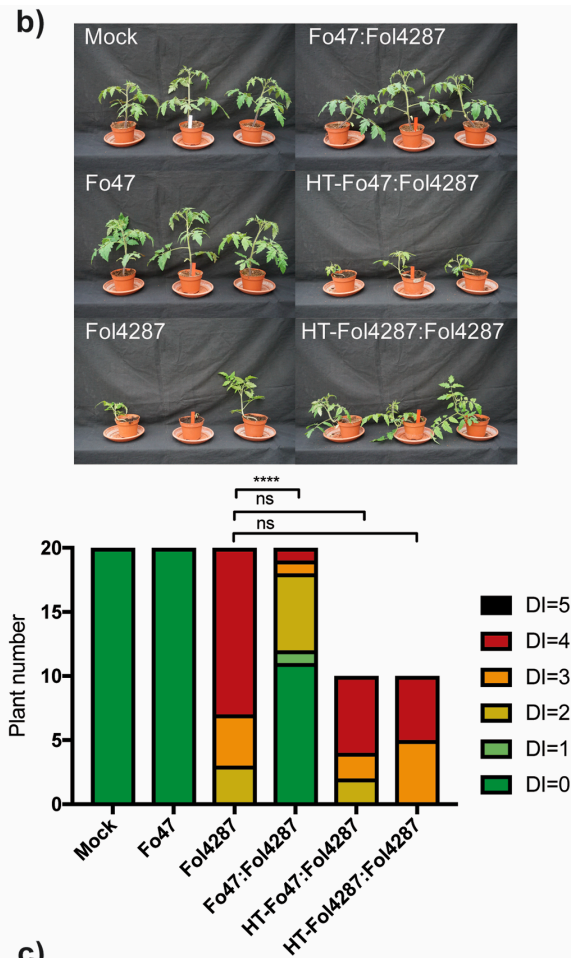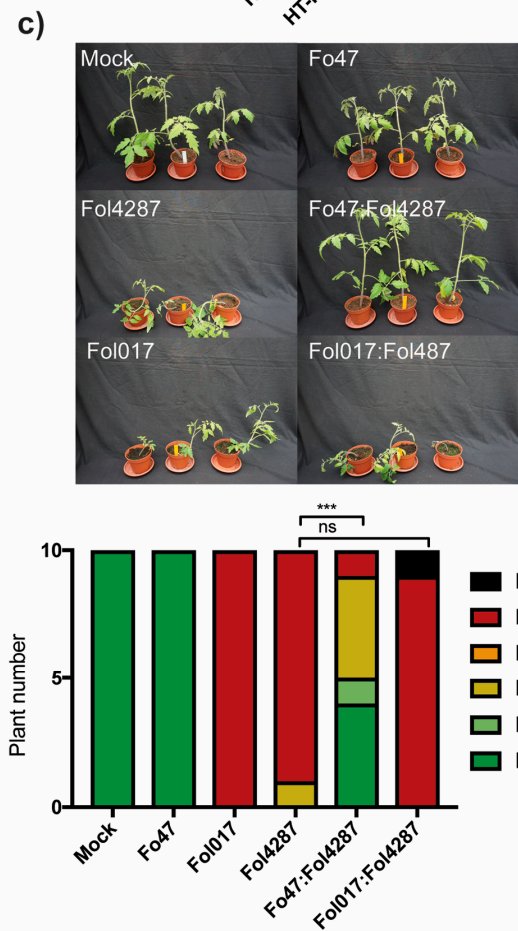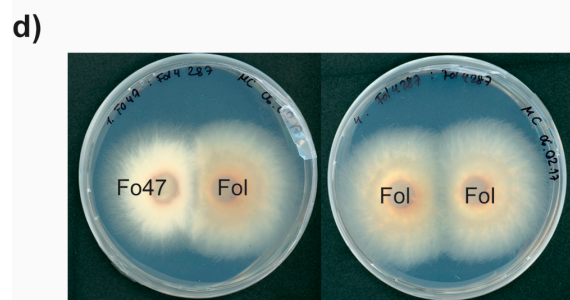

**Figure S1.** Endophyte-mediated resistance set-up. **(a)** Ten-days old tomato seedlings cultivar Money Maker were inoculated with water (mock), Fo47 ( $10^7$  spores/mL), Fol4287 ( $10^7$ ,  $10^6$ ,  $10^5$  spores/mL) or co-inoculated with Fo47 and Fol4287 (ratio 1:1, ratio 10:1 or ratio 100:1). This experiment was performed twice with similar results; **(b)** Ten-days C32 old tomato seedlings were inoculated with water (mock), Fo47 ( $10^7$  spores/mL), Fol4287 ( $10^7$  spores/mL), or co-inoculated with spores (Fo47 or Fol4287) heat-treated at  $60^\circ\text{C}$  for 15 minutes together with Fol4287 ( $10^7$  spores/mL). Disease development was assessed by measuring vascular browning three weeks after inoculation. Disease index (DI) =0 no brown vessels; DI=1 brown vessel(s) only at basal level; DI=2 one or two brown vessel at cotyledon level; DI=3 three brown vessels at cotyledon level, DI=4 all vessels are brown, DI=5 dead plant. Data was analysed by a non-parametric Mann-Whitney U-test ( $^{ns}P>0.05$ ;  $^{***}P<0.0001$ ); **(c)** Ten-days old C32 tomato seedlings were inoculated with water (mock), Fo47 ( $10^7$  spores/ml), Fol4287 ( $10^7$  spores/ml), Fol017 ( $10^7$  spores/ml), co-inoculated with Fo47 and Fol4287 or Fol4287 and Fol017. Disease symptoms were assessed three weeks after inoculation. Data were analysed by a non-parametric Mann-Whitney U-test ( $^{ns}P>0.05$ ;  $^{***}P<0.001$ ); **(d)** Plugs of seven days old (Fo47, Fol4287) mycelia were placed three cm apart on PDA plates. Pictures were taken after six days. Abbreviation: DI= disease index; HT: heat treated.

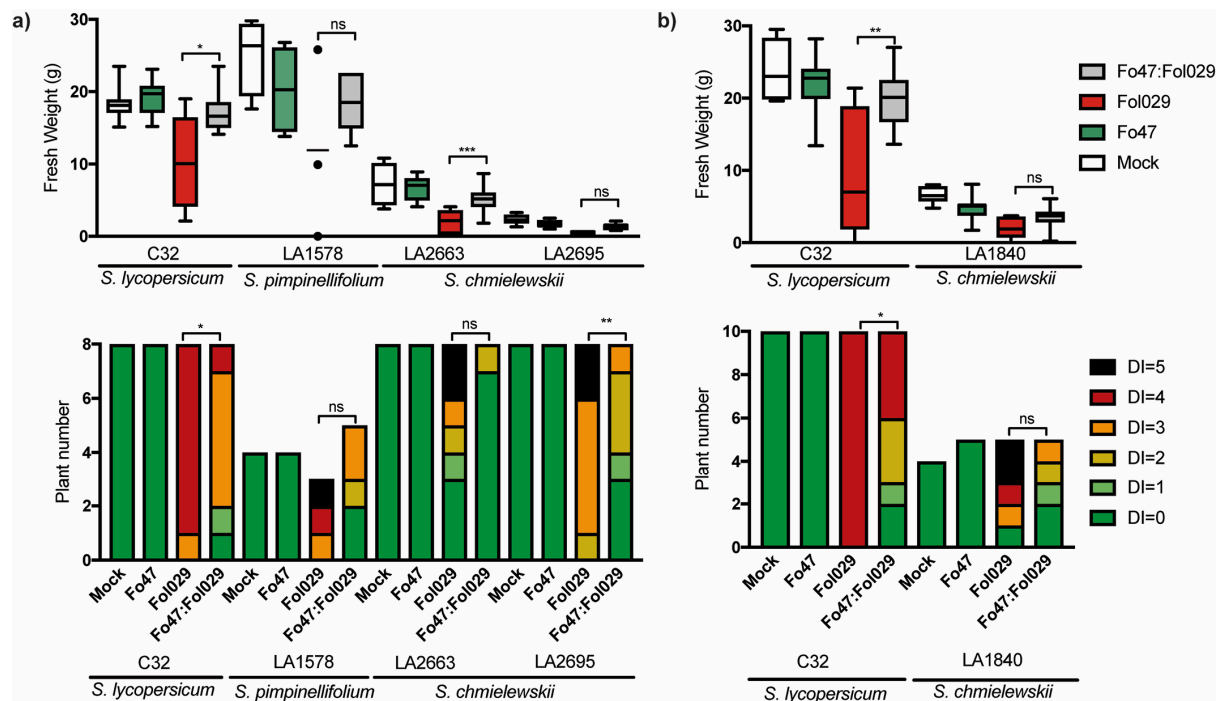

**Figure S2.** Fo47 can trigger resistance against Fol029 in *Solanum lycopersicum* (C-32), **(a)** *S. pimpinellifolium* (LA1578) and *S. chmielewskii* (LA2663, LA2695) and in **(b)** *S. chmielewskii* (LA1840). Thirteen days old tomato seedlings were inoculated with water (mock), Fo47, Fol029 or co-inoculated with Fo47 and Fol029. Fresh weight and disease development were assessed three weeks after inoculation. Disease index (DI) =0 no brown vessels; DI=1 brown vessel(s) only at basal level; DI=2 one or two brown vessel at cotyledon level; DI=3 three brown vessels at cotyledon level, DI=4 all vessels are brown, DI=5 the plant is dead. Data were analysed by a non-parametric Mann-Whitney U-test ( $^{ns}P>0.05$ ;  $^{*}P<0.05$ ;  $^{**}P<0.01$ ;  $^{***}P<0.001$ ).

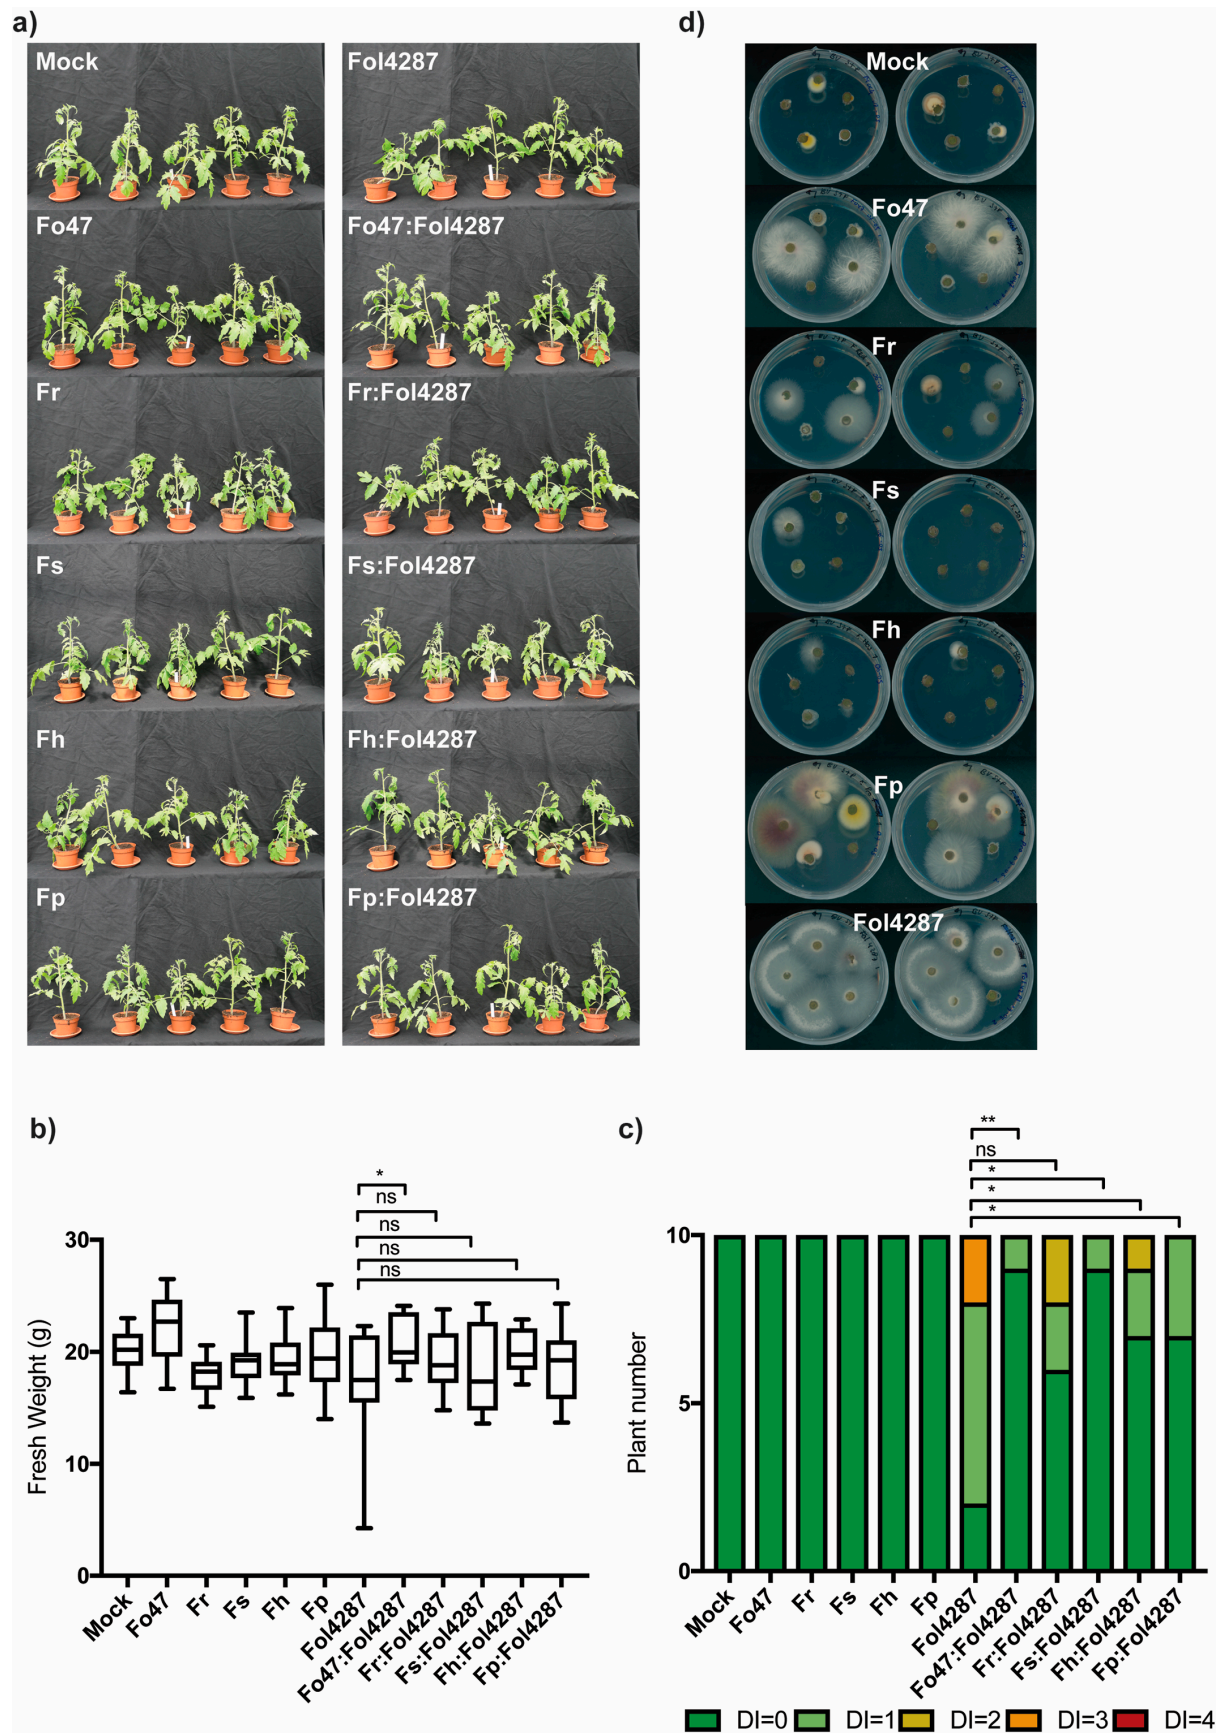

**Figure S3.** Fo47, *Fusarium redolens* (Fr), *Fusarium solani* (Fs), *Fusarium hostae* (Fh) and *Fusarium proliferatum* (Fp) can suppress *Fusarium* wilt disease in tomato. **(a)** Tomato plants three weeks after inoculation; **(b)** Fresh weight and **(c)** disease index of tomato plants three-weeks after inoculation. Disease index (DI) =0 no brown vessels; DI=1 brown



vessel(s) only at basal level; DI=2 one or two brown vessel at cotyledon level; DI=3 three brown vessels at cotyledon level, DI=4 all vessels are brown, DI=5 the plant is dead Data were analysed by a non-parametric Mann-Whitney U-test (<sup>ns</sup> $P>0.05$ ; \* $P<0.05$ ; \*\* $P<0.01$ ; \*\*\* $P<0.001$ ). (d) Ten tomato stems pieces from crown level showing *Fusarium* outgrowth on PDA plates after being incubated in the dark for four days in dark at 25°C.

---

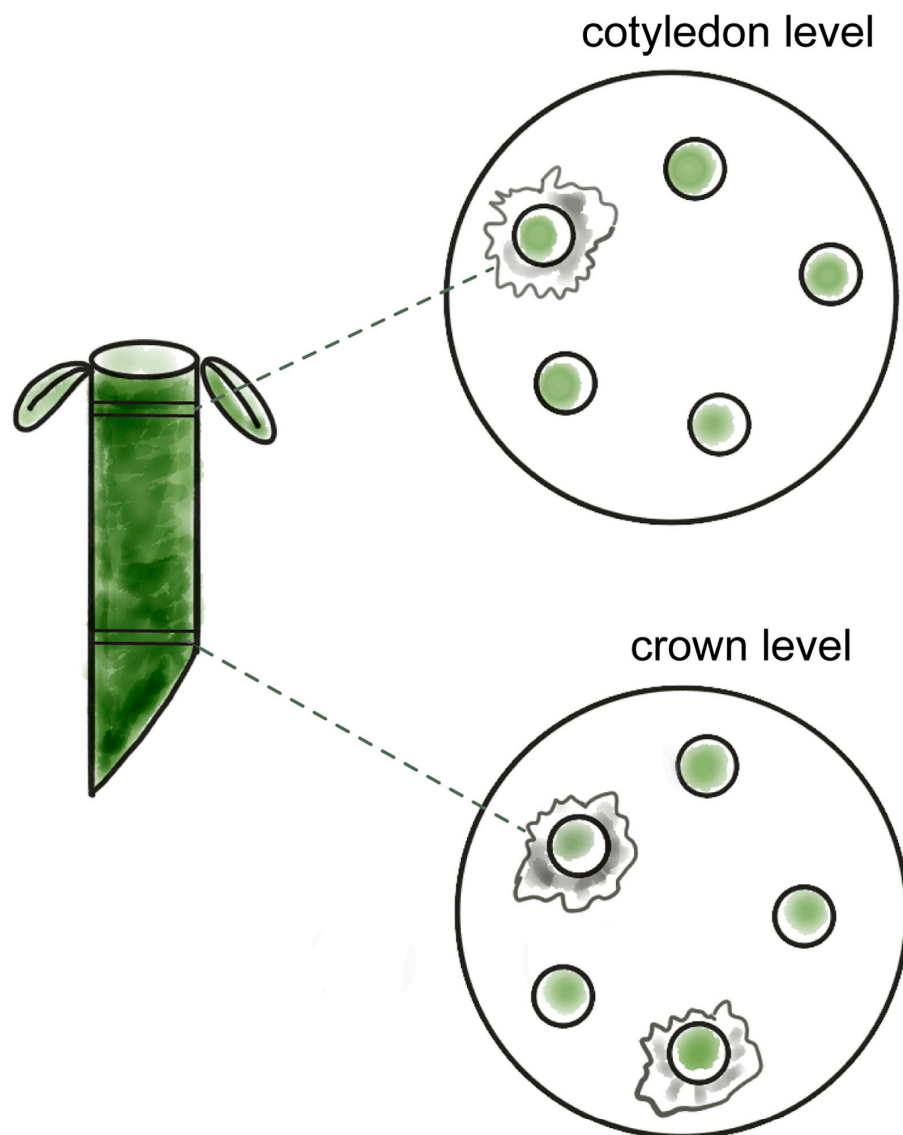

**Figure S4.** Schematic representation of a tomato cotyledon harvested three-weeks after inoculation, surfaced sterilized with 70% ethanol, washed with sterile water twice. A piece at the cotyledon level and crown level was placed on PDA plates (together with four other tomato stem pieces) and incubated for four days at 25°C in the dark.

---



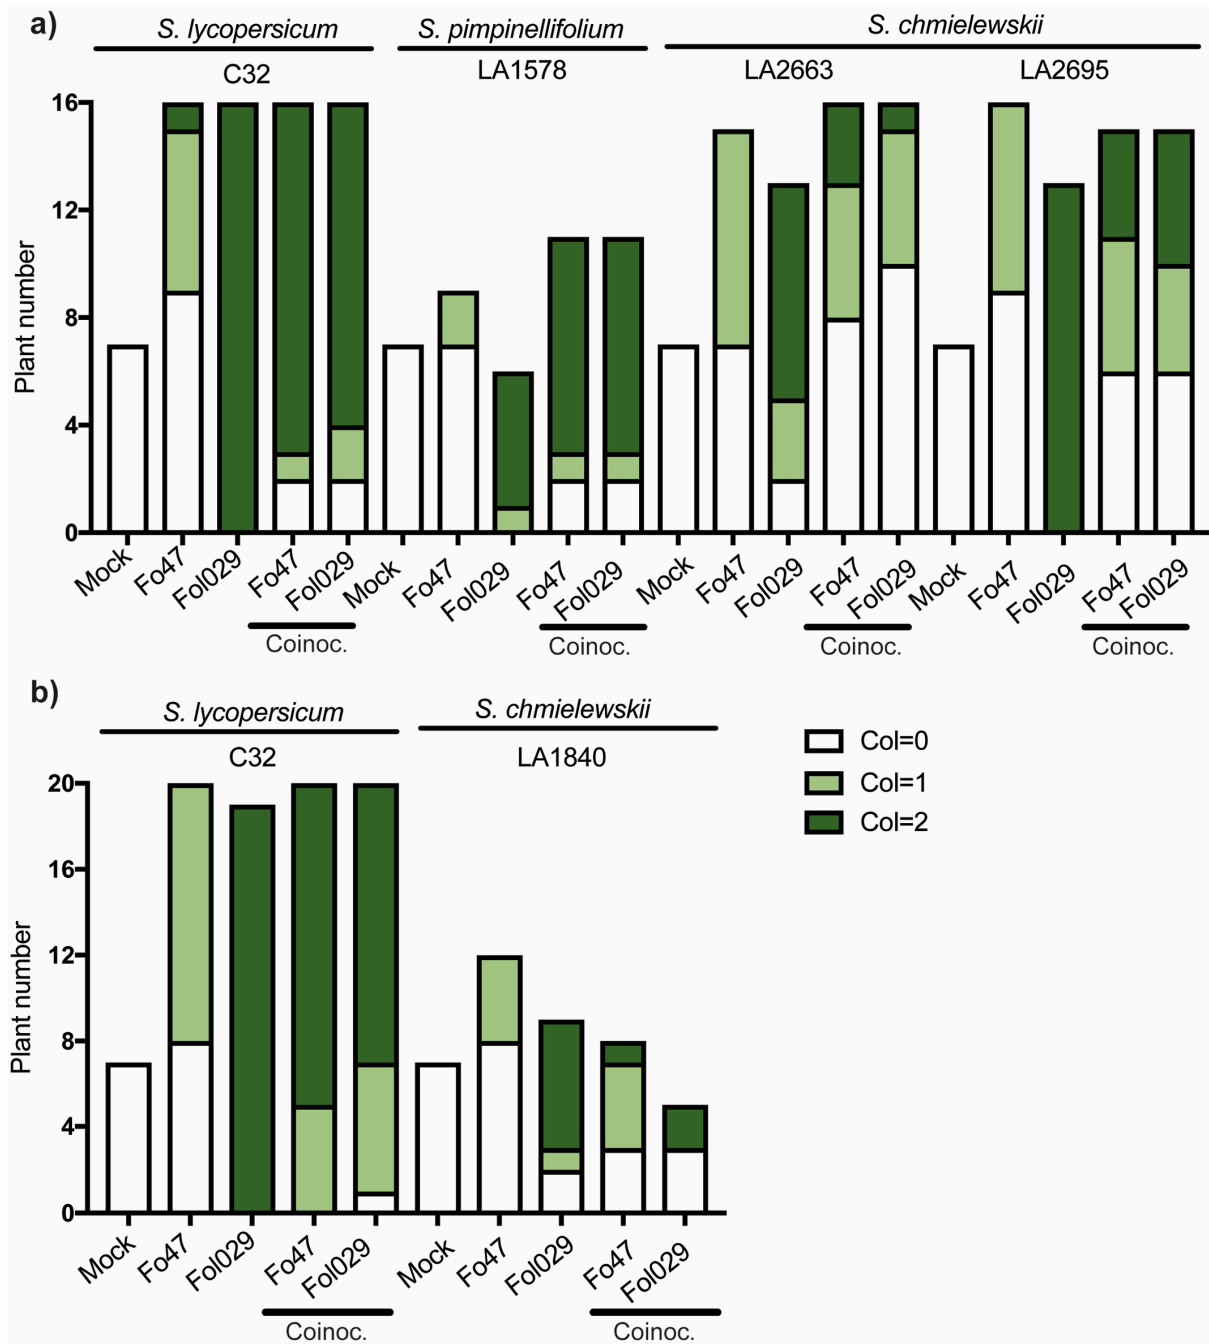

**Figure S5.** Fo47 reaches cotyledon levels upon co-inoculation with Fol029, while pathogen colonization is reduced in *S. lycopersicum* (C-32) (a) *S. pimpinellifolium* (LA1578) and *S. chmielewskii* (LA2663, LA2695); (b) *S. chmielewskii* (LA1840). Col=0: no Fo outgrowth observed; Col=1: Fo outgrowth at either crown or cotyledon level; Col=2: Fo outgrowth at both crown and cotyledon level. Data represented here combine two independent experiments. Abbreviations: Col= colonization; Coinoc.= co-inoculation.

**Table S1.** Primer sequences used for (q)PCR analysis.

| Gene             | Primer names   | Forward primer (5'-3')  | Reverse primer (5'-3')  | Annealing temperature | Reference |
|------------------|----------------|-------------------------|-------------------------|-----------------------|-----------|
| <i>EF1-alpha</i> | FP889, FP1416  | TCGTCGTCATCGGCCACGTC    | GGAAGTACCAGTGATCATGTT   | 55°C                  | [25]      |
| <i>Tubulin</i>   | FP2147, FP2148 | CAGTGAACTGGAGCTGGAA     | TATAGTGGCCACGAGCAAAG    | 60°C                  | —         |
| IGS              | FP8498, FP8499 | TTTGCCATACTATTGAATTTTGC | ACTTTTACCTACCCGGCAGCTC  | 60°C                  | —         |
| SCAR             | FP7069, FP7070 | CCTCAACTTCTGATTAAATATGA | GAGCGAACAACCTACAATAAAAG | 60°C                  | [26]      |
| <i>SIX8</i>      | FP6994, FP7569 | GTATGTCTGATTCTCATGAATAC | GTTATGCAGGCGAGTAAAATG   | 60°C                  | —         |
